# Supplementary material for: Does Native Vitamin D Supplementation Have Pleiotropic Effects in Patients with End-Stage Kidney Disease? A Systematic Review of Randomized Trials
Source: MDPI journal article supplement (doi:10.3390/nu15133072), 2023-07-07
Supplement: s1 [file s1]

## Supplemental Material:

Supplemental Table S1. Vitamin D Supplementation and Nutritional Outcomes.

| Author, year          | Length of Follow-Up (mo) | Study Arms | Randomized (n) | Lost to Follow Up (n) | Included in Final Analysis (n) | Outcome Details                        | Outcomes Measurements |                  | P value * |
|-----------------------|--------------------------|------------|----------------|-----------------------|--------------------------------|----------------------------------------|-----------------------|------------------|-----------|
|                       |                          |            |                |                       |                                |                                        | Baseline              | End of Follow-Up |           |
| Khajehdehi, 2000 [26] | 3                        | D3         | 21             | 6                     | 15                             | Triglyceride to HDL-c Ratio (mean, SD) | 7.35 ±1.26            | 6.37 ±1.14       | 0.0001**  |
|                       |                          | Placebo    | 21             | 7                     | 14                             |                                        | 7.12 ±1.46            | 7.71 ±1.34       | ns**      |
|                       |                          | D3         | 21             | 6                     | 15                             | LDL-c/HDL-c                            | 6.59 ±4.55            | 5.09 ±1.55       | ns**      |
|                       |                          | Placebo    | 21             | 7                     | 14                             |                                        | 4.66 ±1.63            | 4.74 ±1.69       | ns**      |
|                       |                          | D3         | 21             | 6                     | 15                             | Cholesterol/HDL-c ratio                | 7.65 ±1.83            | 7.11 ±1.74       | ns**      |
|                       |                          | Placebo    | 21             | 7                     | 14                             |                                        | 6.94 ±1.75            | 6.6 ±1.76        | ns**      |
|                       |                          | D3         | 21             | 6                     | 15                             | Triglycerides mmol/L                   | 7.16 ±1.24            | 6.41 ±1.09       | 0.001**   |
|                       |                          | Placebo    | 21             | 7                     | 14                             |                                        | 6.77 ±1.00            | 6.65 ±0.88       | ns**      |
|                       |                          | D3         | 21             | 6                     | 15                             | Cholesterol mmol/L                     | 7.42 ±1.45            | 7.09 ±1.50       | ns**      |
|                       |                          | Placebo    | 21             | 7                     | 14                             |                                        | 6.54 ±1.09            | 6.50 ±1.19       | ns**      |
|                       |                          | D3         | 21             | 6                     | 15                             | LDL-c mmol/L                           | 6.57 ±1.11            | 5.07 ±1.33       | ns**      |
|                       |                          | Placebo    | 21             | 7                     | 14                             |                                        | 4.37 ±1.17            | 4.59 ±1.15       | ns**      |
|                       |                          | D3         | 21             | 6                     | 15                             | HDL-c mmol/L                           | 0.98 ±0.14            | 1.01 ±0.16       | **        |
|                       |                          | Placebo    | 21             | 7                     | 14                             |                                        | 0.97 ±0.17            | 1.01 ±0.18       | ns**      |
| Ayub, 2022 [30]       | 2                        | D3         | 35             |                       |                                | Albumin (g/L)                          | 36.5 ±3.8             | 36.6 ±4.2        | 0.818     |
|                       |                          | Placebo    | 35             |                       |                                |                                        | 35.7 ±4.4             | 35.9 ±4.4        |           |
| Brimble, 2022 [29]    | 12                       | D3         | 34             | 5                     | 29                             | Albumin (g/L)                          | 34.8 ±6.4             | 34.1 ±5.6        | 0.2       |
|                       |                          | Placebo    | 31             | 5                     | 24                             |                                        | 36.6 ±6.4             | 32.6 ±9.8        |           |
| Gregorio 2021 [32]    | 6                        | D3         | 18             | 6                     | 12                             | Albumin (g/L)                          | 39 ±2.0               | 4.0 ±0.2         | ns        |
|                       |                          | Placebo    | 14             | 3                     | 11                             |                                        | 41 ±2.0               | 4.2 ±0.3         |           |
| Seirafian, 2014 [38]  | 3                        | VD         | 49             | 3                     | 46                             | Albumin (g/L)                          | 34 ±5.2               | 33 ±4.5          | 0.38**    |
|                       |                          | Placebo    | 40             | 2                     | 38                             |                                        | 33 ±5.3               | 32 ±6.1          |           |
| Wang, 2016 [15]       | 12                       | D3         | 362            | 0                     | 362                            | Albumin (g/L)                          | 35.2 ±5.9             | 37.3 ±8.7        | 0.08      |
|                       |                          | Placebo    | 364            | 0                     | 364                            |                                        | 34.7 ±4.3             | 34.52 ±6.        |           |
|                       |                          | D3         | 362            | 0                     | 362                            | Prealbumin (g/L)                       | 323.6 ±42.9           | 337.9 ±60.1      | 0.07      |
|                       |                          | Placebo    | 364            | 0                     | 364                            |                                        | 341.7 ±55.3           | 326.5 ±48.5      |           |

HDL-c: high density lipoprotein cholesterol; LDL-c: low density lipoprotein cholesterol. \* p value represents the significance level of the treatment effect between groups, \*\* p value represents the significance level of the treatment effect within groups from baseline

Supplemental Table S2. Vitamin D and Well Being (Quality of Life, Pain, Depression).

| Author, Year      | Length of Follow-Up (mo) | Study Arms | Randomized (n) | Lost to Follow-Up (n) | Included in Final Analysis (n) | Outcome Details    | Outcome Measurements |                  | P value* |
|-------------------|--------------------------|------------|----------------|-----------------------|--------------------------------|--------------------|----------------------|------------------|----------|
|                   |                          |            |                |                       |                                |                    | Baseline             | End of Follow-Up |          |
| Ayub, 2022 [30]   | 2                        | D3         | 35             | NR                    | NR                             | Chronic Pain (VAS) | 7.09 ±1.42           | 3.20 ±1.87       | <0.001** |
|                   |                          | Placebo    | 35             | NR                    | NR                             |                    | 6.37 ±1.6            | 5.37 ±0.004      | 0.004*   |
| Wang, 2016 [15]   | 12                       | D3         | 373            | 11                    | 362                            | BDI-II             | 22.7 ±4.3            | 19.6 ±3.7        | 0.06     |
|                   |                          | Placebo    | 373            | 9                     | 364                            |                    | 21.9 ±5.4            | 20.8 ±5.1        |          |
| Hewitt, 2013 [33] | 6                        | D3         | 30             | 0                     | 30                             | KDQOL-36           | NR                   | NR               | ns       |
|                   |                          | Placebo    | 30             | 0                     | 30                             |                    | NR                   | NR               |          |
| Singer, 2019 [40] | 12                       | D3         | 36             | 7                     | 29                             | KDQOL-SF           | 70.4 ± 13            | 73 ±15           | 0.66     |
|                   |                          | Placebo    | 32             | 6                     | 26                             |                    | 73.1 ± 13.8          | 75 ±14           |          |

BDI-II: Beck's Depressive Inventory-II Chinese version; KDQOL-36: Kidney Disease Quality of Life-36; KDQOL-SF: Kidney Disease Quality of Life Short Form. \* p value represents the significance level of the effect of treatment between groups, \*\* p value represents the significance level of the treatment effect within groups from baseline

Supplemental Table S3. Vitamin D Supplementation and Vitamin D Status (nmol/L).

| Author              | Baseline 25D     |                                        | Study End 25D                                              |                                        | Hypercalcemia in VD group       | Hypercalcemia in control group | Vitamin D toxicity 25(OH)D > 250 nmol/L |
|---------------------|------------------|----------------------------------------|------------------------------------------------------------|----------------------------------------|---------------------------------|--------------------------------|-----------------------------------------|
|                     | 25(OH)D (nmol/L) | Control                                | Vitamin D                                                  | Control                                |                                 |                                |                                         |
| Ambrus, 2003 [21]   | 87.4 ±39.9       | Not specifically reported <sup>1</sup> | 132.3 ± 5                                                  | Not specifically reported <sup>1</sup> | 12                              | 10                             | NR                                      |
| Ayub, 2022 [30]     | 37.7 ±13.3       | 42.5 ± 14.0                            | 64.8 ± 17.7                                                | 35.1 ± 11.7                            | NR                              | NR                             | NR                                      |
| Bahn, 2015 [27]     | 54.7 ± 17.2      |                                        | 25D > 80 nmol/L<br>91% in weekly arm<br>65% in monthly arm | 25D > 80 nmol/L<br>35%                 | Monthly arm: 1<br>Weekly arm: 2 | 1                              | NR                                      |
| Brimble, 2022 [29]  | 51.6 ± 29.2      | 48.5 ± 21.5                            | 68.9 ± 14.3                                                | 40.3 ± 17.6                            | 4 (11.8%)                       | 6 (19.4%)                      | NR                                      |
| Delayne, 2013 [31]  | 30 ± 12          | 30 ± 15                                | Not specifically reported <sup>1</sup>                     | Not specifically reported <sup>1</sup> | 0                               | 0                              | 0                                       |
| Gregoire, 2021 [32] | 37.9 [26.5-57.7] | 54.9 [42.9-60.2]                       | 115.1 [97.6-156.8]                                         | 62.7 [34.2-77.4]                       | 1                               | 0                              | NR                                      |
| Hewitt, 2013 [33]   | 44.9 ± 12.5      | 39.9 ± 9.0                             | 89.9 ± 20                                                  | 39.9 ± 17.5                            | 3                               | 2                              | NR                                      |

|                               |                                       |                                       |                                    |                                  |    |    |                  |
|-------------------------------|---------------------------------------|---------------------------------------|------------------------------------|----------------------------------|----|----|------------------|
| Khajehdeh<br>i, 2000<br>[26]  | NR                                    | NR                                    | NR                                 | NR                               | NR | NR | NR               |
| Mehrotra,<br>2013<br>[20]     | 32.2                                  | 32.5                                  | 97.8                               | NR                               | 0  | NR | NR               |
| Meireles<br>[34]              | 35.7 ±<br>11.7                        | 34.7 ± 10.5                           | 107.6 ± 27.5                       | 33.7 ± 10.7                      | 0  | 0  | NR               |
| Mieczkow<br>ski, 2014<br>[23] | 28.2<br>(16.6-<br>48.2)               | 37.2 (19.7-<br>44.4)                  | 112.1 (77.4-<br>147.3)             | 44.9 (18.1-65.9)                 | 3  | 0  | NR               |
| Miskulin,<br>2016<br>[28]     | 39.9 ±<br>14.7                        | 42.2 ± 16.0                           | 97.8 ± 12.2                        | 43.7 ± 18.5                      | 0  | 0  | NR               |
| Morrone,<br>2021<br>[22]      | 29.5 ±<br>17.0                        | 32.2 ± 16.5                           | 36% achieved<br>25D > 75<br>nmol/L | 11% achieved<br>25D > 75 nmol/L  | 2  | 8  | 1 (VD)<br>2 (SC) |
| Mose,<br>2014<br>[35]         | 28 [20,48]                            | 28 [20,69]                            | 84 [65,125]                        | 30 [22,0]                        | 1  | 5  | NR               |
| Naini,<br>2015<br>[36]        | M:<br>54.2±14.9<br>F: 50.0 ±<br>21.31 | M: 52.2 ±<br>16.2<br>F: 53.9<br>±16.2 | M: 79.2 ± 7.6<br>F: 79 ± 9.4       | M: 54.2 ± 14.9<br>F: 57.7 ± 16.2 | NR | NR | NR               |
| Siebert,<br>2013<br>[37]      | 29.4 ±<br>11.2                        | 33.6 ± 16.6                           | 87.8 ± 22.3                        | 24.6 ± 8.0                       | 0  | 1  | NR               |
| Seirafian,<br>2014<br>[38]    | 42.2 ±<br>35.9                        | 48.7 ± 63.6                           | 79.6 ± 36.7                        | 30.4 ± 14.0                      | NR | NR | NR               |
| Shirazian,<br>2013<br>[39]    | 49.2 ±<br>25.2                        | 38.2 ± 17.5                           | 96.6 ± 33.5                        | 41.7 ± 25.7                      | 0  | 0  | NR               |
| Singer,<br>2019<br>[40]       | 33.9 ± 9.0                            | 33.8 ± 11.2                           | 119 [101-<br>157]                  | 37 [28-57]                       | 9  | 6  | 0                |
| Ulrich,<br>2021<br>[41]       | 32.3 ± 17.8                           |                                       | 87.8 ± 22.3                        | 29.4 ± 11.2                      | NR | NR | NR               |
| Wang,<br>2016<br>[15]         | 22.9 ± 4.1                            | 24.2 ± 9.8                            | 41.3 ± 13.7                        | 23.1 ± 7.5                       | NR | NR | NR               |
| Wasse,<br>2014<br>[24]        | 36.4 ±<br>14.5                        | 41.9 ± 16.2                           | 133.3 ± 44.2                       | 45.9 ± 18.5                      | NR | NR | NR               |
| Zheng,<br>2018<br>[25]        | 47.9 ±<br>18.5                        | 45.4 ± 21.0                           | 93.4 ± 24.0                        | 58.4 ± 18.7                      | NR | NR | NR               |

F: female participants; M: male participants; NR: Not reported; VD: Vitamin D; <sup>1</sup> data presented graphically.
